# Supplementary material for: Targeting SASP with FDA-approved agents: minoxidil and diazoxide as potential senomorphic agents in cancer therapy
Source: publisher site journal article supplement (doi:10.1515/tjb-2025-0249), 2025-12-01
Supplement: Supplementary file 1 [file j_tjb-2025-0249_suppl_002.docx]

**Supplemental Figure 1:** Schematic overview of the experimental procedures.

(A) Workflow for evaluating the potential effects of K⁺ATP channel openers and L-type Ca²⁺ channel blockers on the development of cellular senescence. (B) Workflow for assessing the potential effects of K⁺ATP channel openers and L-type Ca²⁺ channel blockers on SASP secretion.
